# Supplementary material for: A cloud feedback emulator (CFE, version 1.0) for an intermediate complexity model
Source: Copernicus journal article supplement (doi:10.5194/gmd-10-945-2017), 2017-02-23
Supplement: Supplementary file 1 [file gmd-10-945-2017-supplement.zip]

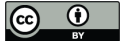

## *Supplement of*

# **A cloud feedback emulator (CFE, version 1.0) for an intermediate complexity model**

**David J. Ullman and Andreas Schmittner**

*Correspondence to:* David J. Ullman (dullman@northland.edu)

- gmd-10-945-2017-supplement-title-page.pdf
- UVic\_CFE\_code
  - OLWslope\_files
    - \* A\_rlutslope\_CCSM\_4x.nc
    - \* A\_rlutslope\_CCSM\_lgm.nc
    - \* A\_rlutslope\_CNRM\_4x.nc
    - \* A\_rlutslope\_CNRM\_lgm.nc
    - \* A\_rlutslope\_GISS\_4x.nc
    - \* A\_rlutslope\_GISS\_lgm.nc
    - \* A\_rlutslope\_IPSL\_4x.nc
    - \* A\_rlutslope\_IPSL\_lgm.nc
    - \* A\_rlutslope\_MIROC\_4x.nc
    - \* A\_rlutslope\_MIROC\_lgm.nc
    - \* A\_rlutslope\_MPI\_4x.nc
    - \* A\_rlutslope\_MPI\_lgm.nc
    - \* A\_rlutslope\_MRI\_4x.nc
    - \* A\_rlutslope\_MRI\_lgm.nc
  - README
  - UVic\_2.9\_CFEcode\_updates
    - \* #npzd\_src.F#
    - \* UVic\_ESCM.F
    - \* UVic\_ESCM.F
    - \* aggdata.F
    - \* atm.h
    - \* atm.h
    - \* bhf.F
    - \* bhf.F

- \* canopy.F
- \* canopy.F
- \* carbon.h
- \* cembm.h
- \* cembm.h
- \* cfcdata.F
- \* clinic.F
- \* co2calc.F
- \* co2calc.F
- \* co2data.F
- \* cpts.F
- \* cpts.F
- \* csbc.h
- \* csbc.h
- \* ctdbc.h
- \* ctdbc.h
- \* data.F
- \* data.F
- \* def\_files.F
- \* diag.h
- \* diago.F
- \* embm.F
- \* embm.F
- \* embm\_rest.F
- \* embm\_tavg.F
- \* embm\_tsi.F
- \* embm\_tsi.F
- \* embmio.F
- \* embmio.F
- \* fdifm.h
- \* file\_names.F
- \* file\_names.F
- \* fluxes.F
- \* fluxes.F
- \* gasbc.F
- \* gasbc.F
- \* global\_sums.F
- \* glsbc.F
- \* glsbc.F
- \* gosbc.F
- \* gosbc.F
- \* gvsbc.F
- \* hmixc.F
- \* hmixc.h
- \* ice.h
- \* iomngr.F
- \* isopyc.F

- \* isopyc.h
- \* levind.h
- \* loadmw.F
- \* lotka.F
- \* mom\_rest.F
- \* mom\_rest.F
- \* mom\_tavg.F
- \* mom\_tavg.F
- \* mom\_tsi.F
- \* mtlm.F
- \* mtlm.F
- \* mtlm.h
- \* mtlm\_data.h
- \* mtlm\_rest.F
- \* mtlm\_state.F
- \* mtlm\_tsi.F
- \* mtlmio.F
- \* mw.h
- \* npzd.h
- \* npzd.h
- \* npzd\_src.F
- \* npzd\_src.F
- \* param.h
- \* param.h
- \* sed.h
- \* sed\_rest.F
- \* sed\_tsi.F
- \* sedio.F
- \* setcom.F
- \* setdata.F
- \* setdata.F
- \* setembm.F
- \* setmom.F
- \* setmom.F
- \* setmtlm.F
- \* setsed.F
- \* setvbc.F
- \* setvbc.F
- \* size.h
- \* solve.F
- \* solve.F
- \* stab.F
- \* sulphdata.F
- \* switch.F
- \* switch.h
- \* therm.F
- \* therm.F

- \* tidal\_kv.h
- \* tidal\_kv.h
- \* timeavgs.F
- \* timeavgs.F
- \* timeavgs.h
- \* topog.F
- \* tracer.F
- \* tracer.F
- \* tracer\_adv\_flux.F
- \* triffid.F
- \* veg.h
- \* vmixc.F
- \* vmixc.F
- \* volcdata.F
- \* winds.F
- UVic\_2.9\_sourcecode
  - \* common
  - \* embm
  - \* ice
  - \* ism
  - \* mom
  - \* mtlm
  - \* netcdf
  - \* rot
  - \* sed
- albslope\_files
  - \* A\_albslope\_CCSM\_4x.nc
  - \* A\_albslope\_CCSM\_lgm.nc
  - \* A\_albslope\_CNRM\_4x.nc
  - \* A\_albslope\_CNRM\_lgm.nc
  - \* A\_albslope\_GISS\_4x.nc
  - \* A\_albslope\_GISS\_lgm.nc
  - \* A\_albslope\_IPSL\_4x.nc
  - \* A\_albslope\_IPSL\_lgm.nc
  - \* A\_albslope\_MIROC\_4x.nc
  - \* A\_albslope\_MIROC\_lgm.nc
  - \* A\_albslope\_MPI\_4x.nc
  - \* A\_albslope\_MPI\_lgm.nc
  - \* A\_albslope\_MRI\_4x.nc
  - \* A\_albslope\_MRI\_lgm.nc
- control.in.4x
- control.in.LGM
- control.in.pi\_control
- data\_files
  - \* A\_aggfor.nc
  - \* A\_albslope.nc

- \* A\_calbatm.nc
- \* A\_calbatm\_CERES\_950.nc
- \* A\_calbatm\_original.nc
- \* A\_cfc.nc
- \* A\_co2.nc
- \* A\_dc14.nc
- \* A\_diff.nc
- \* A\_diff\_original.nc
- \* A\_rlutslope.nc
- \* A\_satctrl.nc
- \* A\_satctrl\_clim\_p950G.kh2.fixed2.nc
- \* A\_slatref.nc
- \* A\_solarcon.nc
- \* A\_sulphod.nc
- \* A\_volcfor.nc
- \* A\_wind.nc
- \* A\_wind\_original.nc
- \* A\_windsur.nc
- \* A\_windsur\_lgm\_pmip3ave.nc
- \* A\_windsur\_original.nc
- \* F\_co2dist.nc
- \* F\_co2emit.nc
- \* G\_grid.nc
- \* G\_kmt.nc
- \* G\_mskhreg.nc
- \* G\_mskt.nc
- \* G\_subgrid\_bathy.nc
- \* G\_subgrid\_ocean\_mask.nc
- \* L\_cropfra.nc
- \* L\_diurtemp.nc
- \* L\_elev.nc
- \* L\_ice.nc
- \* L\_potveg.nc
- \* L\_rivers.nc
- \* O\_alk.nc
- \* O\_cfc.nc
- \* O\_dc14.nc
- \* O\_diffac.nc
- \* O\_fe\_dissolved.nc
- \* O\_no3.nc
- \* O\_o2.nc
- \* O\_po4.nc
- \* O\_sal.nc
- \* O\_salsur.nc
- \* O\_tau.nc
- \* O\_temp.nc
- \* O\_tempsur.nc

- \* O\_tidenrg.nc
- \* O\_totcarb.nc
- \* insol\_month.nc
- \* restart.spinup.nc
- mk.in.4x
- mk.in.LGM
- mk.in.pi\_control

The copyright of individual parts of the supplement might differ from the CC-BY 3.0 licence.
